# Supplementary material for: Antiviral RNAi Response in Culex quinquefasciatus-Derived HSU Cells
Source: MDPI journal article supplement (doi:10.3390/v15020436), 2023-02-04
Supplement: s1 [file s1]

**Supplementary data, Altinli et al.**

**Table S1.** VectorBase gene identifiers of RNAi transcripts identified in *Culex quinquefasciatus* and corresponding orthologues in *Aedes aegypti*.

| Transcript Name      | Gene identifier<br><i>Ae. aegypti</i> | Gene identifier<br><i>Cx. quinquefasciatus</i>                                                                                  |
|----------------------|---------------------------------------|---------------------------------------------------------------------------------------------------------------------------------|
| Argonaute-1 (Ago1)   | AAEL012410                            | XM_038258517.1,<br>XM_038258518.1,<br>XM_038258516.1,<br>XM_038258515.1,<br>XM_038258522.1,<br>XM_038258521.1,<br>XM_038258519. |
| Argonaute-2a (Ago2a) | AAEL017251                            | XM_038263062.1/2                                                                                                                |
| Argonaute-2b (Ago2b) | AAEL017251                            | XM_038262260.1                                                                                                                  |
| Argonaute-3 (Ago3)   | AAEL007823                            | XM_038254040.1                                                                                                                  |
| Piwi1                | AAEL007823                            | XM_001844015.2                                                                                                                  |
| Piwi2                | AAEL008098                            |                                                                                                                                 |
| Piwi3                | AAEL013692                            | XM_038255983.1                                                                                                                  |
| Piwi4                | AAEL007698                            | XM_038251629.1                                                                                                                  |
| Piwi5                | AAEL013233                            | XM_038251859.1                                                                                                                  |
| Piwi6A               | AAEL013227                            | XM_038251858.1<br>(XM_038251857.1)                                                                                              |
| Piwi6B               | AAEL013227                            | XM_038258148.1                                                                                                                  |
| Piwi7                | AAEL006287                            | XM_038266499.1                                                                                                                  |

**Table S2.** Primers used for dsRNA production (T7 primers) and relative quantification (qPCR primer) for the respective target RNAi transcripts. Primers are presented in the 5'→3' direction. The T7 RNA polymerase promotor sequence is highlighted in *italics*.

| Name  | Accession Number | Primers with T7 (5'-3'), FW/RV                                                                                            | qPCR Primer (5'-3') FW/RV                          |
|-------|------------------|---------------------------------------------------------------------------------------------------------------------------|----------------------------------------------------|
| Ago2a | XM_038263062.1/2 | <i>TAATACGACTCACTATAGGG</i><br>CCGCTAAACCGAAAGGAAAC/<br><i>TAATACGACTCACTATAGGG</i><br>ACTTTTGCTGCTTCTGCTG                | CAGATGGACAAGGTTGGGG<br>T/CAGTTTGGAGCCAAAGAC<br>CAC |
| Ago2b | XM_038262260.1   | <i>GTA ATA CGA CTC ACT ATA GGG</i><br>GGCGTTTCTCAGCAGTATGG/<br><i>GTA ATA CGA CTC ACT ATA GGG</i><br>TCTTGCTGCTCCTGTTGCTT | CACAAGTCCGGGCGTGAA/<br>GGGGGAAGATTCTGGTTAC<br>GG   |
| Ago3  | XM_038254040.1   | <i>GTA ATA CGA CTC ACT ATA GGG</i><br>GGCCTTCATCGTGGTTCAGA/<br><i>GTA ATA CGA CTC ACT ATA GGG</i><br>CGGGCCAGTTGTAGTACAGG | CTGTCAGTACGCCCACAAG<br>A/<br>TATCGTTCAGCACCTCGTCC  |
| Piwi1 | XM_001844015.2   | <i>TAATACGACTCACTATAGGG</i><br>ATCGGGGACACTCTTCGAAC/<br><i>TAATACGACTCACTATAGGG</i><br>CACACGAGAATGTCCTGCTC               | GGGGTATGCGGTTTCGAAAT<br>C/<br>ACCGATCCGCTTTGTTGTTC |
| Piwi3 | XM_038255983.1   | <i>TAATACGACTCACTATAGGG</i><br>ATCGGGGACACTCTTCGAAC/<br><i>TAATACGACTCACTATAGGG</i><br>ATCGGGGACACTCTTCGAAC/              | GGGGTATGCGGTTTCGAAAT<br>C/<br>ACCGATCCGCTTTGTTGTTC |

|        |                                    |                                                                                                             |                                                     |
|--------|------------------------------------|-------------------------------------------------------------------------------------------------------------|-----------------------------------------------------|
|        |                                    | TAATACGACTCACTATAGGGCACACGAG<br>AATGTCCTGCTC                                                                |                                                     |
| Piwi4  | XM_038251629.1                     | GTA ATA CGA CTC ACT ATA GGG<br>CGGCTAGTTGAGGTTTCGAGG/GTA ATA<br>CGA CTC ACT ATA GGG<br>CGATCGCCCAATGTTTGAGC | ACGCCCCGAAAATGTCTGAC<br>C/GTCACGACCCTCACTGCT<br>AT  |
| Piwi5  | XM_038251859.1                     | TAATACGACTCACTATAGGG<br>CACTACCAAGCTGAGCATGC/TAATACG<br>ACTCACTATAGGG<br>GTGCCAACCTTACGCAACTT               | ACGAGACACAGACTTCGCA<br>G/CCATCTCCGTCGTTCCATC<br>A   |
| Piwi6a | XM_038251858.1<br>(XM_038251857.1) | TAATACGACTCACTATAGGG<br>CCGACGCAGGTAATCAAGTG/TAATACG<br>ACTCACTATAGGGCAATCTTGTCCCTGAT<br>GGCG               | CTACATTACCAGCATCCGA<br>CAG/TGCACTTCTCAAACAG<br>GTCG |
| Piwi6b | XM_038258148.1                     | TAATACGACTCACTATAGGG<br>CGGAGGTTATCAACATGGCG/TAATACG<br>ACTCACTATAGGG<br>TCGCACAGCTTGTTCTCTAGA              | TCAAGGTGCTCATGGAATC<br>G/GACCGTTGAGTAGAATTC<br>CGAG |

**Table S3.** Primers used to detect viral DNA production.

| Primer Name | Sequence (5'-3'), FW/RV                          | Amplicon Size |
|-------------|--------------------------------------------------|---------------|
| BUNV-set1-F | ACTCCACACTACAACTTGC/<br>ACTGGGTTGTTCCGGTTG       | 330 bp        |
| BUNV-set2-F | CCTCTCCATCATTCCAAGTG                             | 290 bp        |
| BUNV-set3-F | AGATGCTGAAAGTCAGTGAACC/<br>CCAACCTAAGCTAGAGACAAC | 322 bp        |
| BUNV-set4-F | ACAATGCGGCAGAGGTAC/<br>TTAGCCCGCTGTCTTTCTG       | 286 bp        |

**Table S4.** Small RNA-seq data from both repeats.

|                                 | Total Raw Reads | Mapped Reads (BUNV-Specific) | % Total | Total siRNA (21 nt) | %Mapped siRNA | Total piRNA (26–29 nt) | %Mapped piRNA | siRNA/piRNA |
|---------------------------------|-----------------|------------------------------|---------|---------------------|---------------|------------------------|---------------|-------------|
| E-518 (Figure 3)                | 26,773,368      | 1,545,163                    | 0.058   | 205,590             | 0.133         | 1,339,573              | 0.867         | 0.15        |
| G-520 (Supplementary Figure S1) | 24,362,700      | 29,464,450                   | 1.209   | 557,655             | 0.019         | 28,906,795             | 0.981         | 0.02        |

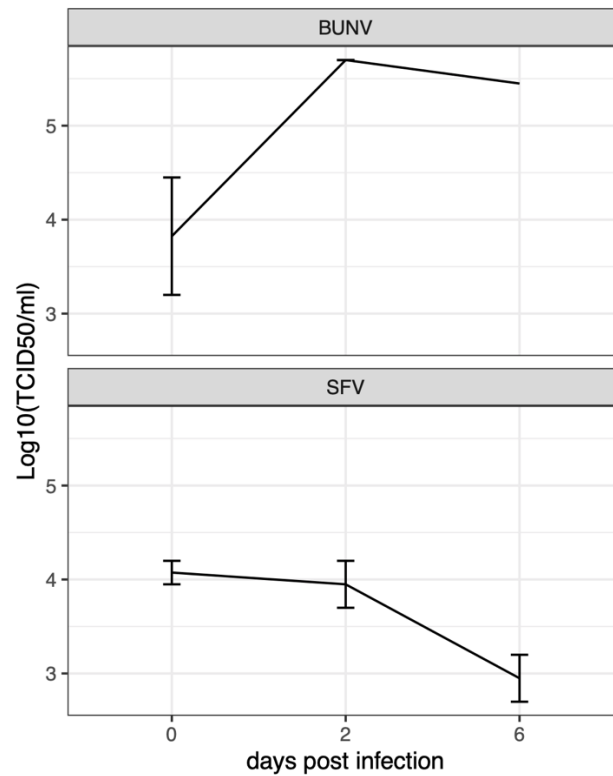

**Figure S1.** BUNV and SFV growth kinetics in *Cx. quinquefasciatus*-derived HSU cells. HSU cells were inoculated either with BUNV-Nluc (MOI 2) or with SFV-Nluc (MOI 10). Viral replication was measured as TCID50/mL; two independent experiments (except BUNV Nluc 6dpi,  $n = 1$ ) performed in technical duplicates are shown with standard errors. Growth kinetics were measured at 0, 2 and 6 days post-infection.

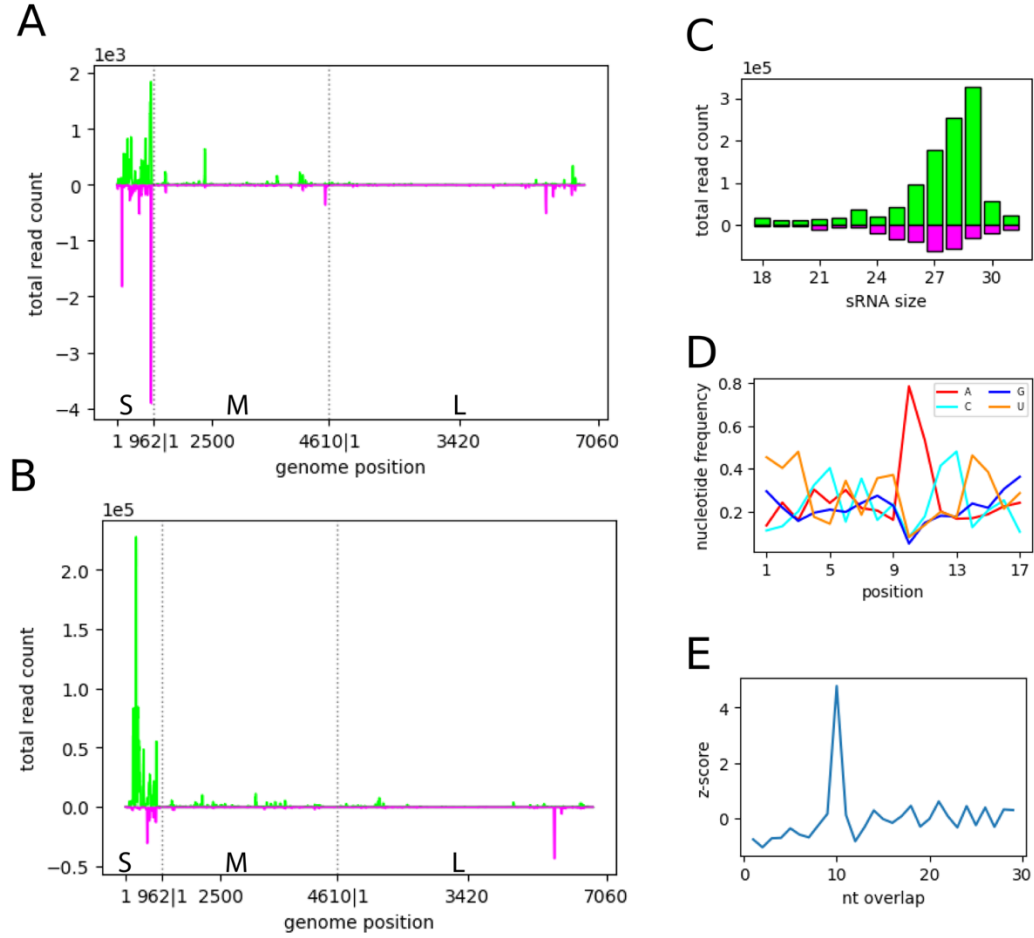

**Figure S2.** Second repeat of small RNA sequencing of BUNV-infected *Cx. quinquefasciatus*-derived HSU cells. Small RNAs of HSU cells were mapped to the BUNV genome and antigenome. (A) Distribution of the 21 nt small RNAs or (B) 26–29 nt small RNAs along the genome and antigenome of the three segments of BUNV (S, M, L). (C) Length distribution of BUNV-specific small RNAs. Positive numbers are RNAs mapping to the antigenome of BUNV (green), while negative numbers indicate RNAs mapping to the genome of BUNV (pink). Y-axis: absolute count of small RNAs. (D) Relative nucleotide frequency and conservation per position of 26–29 nt small RNAs mapping to the BUNV genome or antigenome. (E) The overlap z-score indicating the probability of overlap between the genome and antigenome of 26–29 nt BUNV-specific small RNAs was calculated. Two independent experiments were carried out, and the results of one experiment are shown here (see Figure 2).

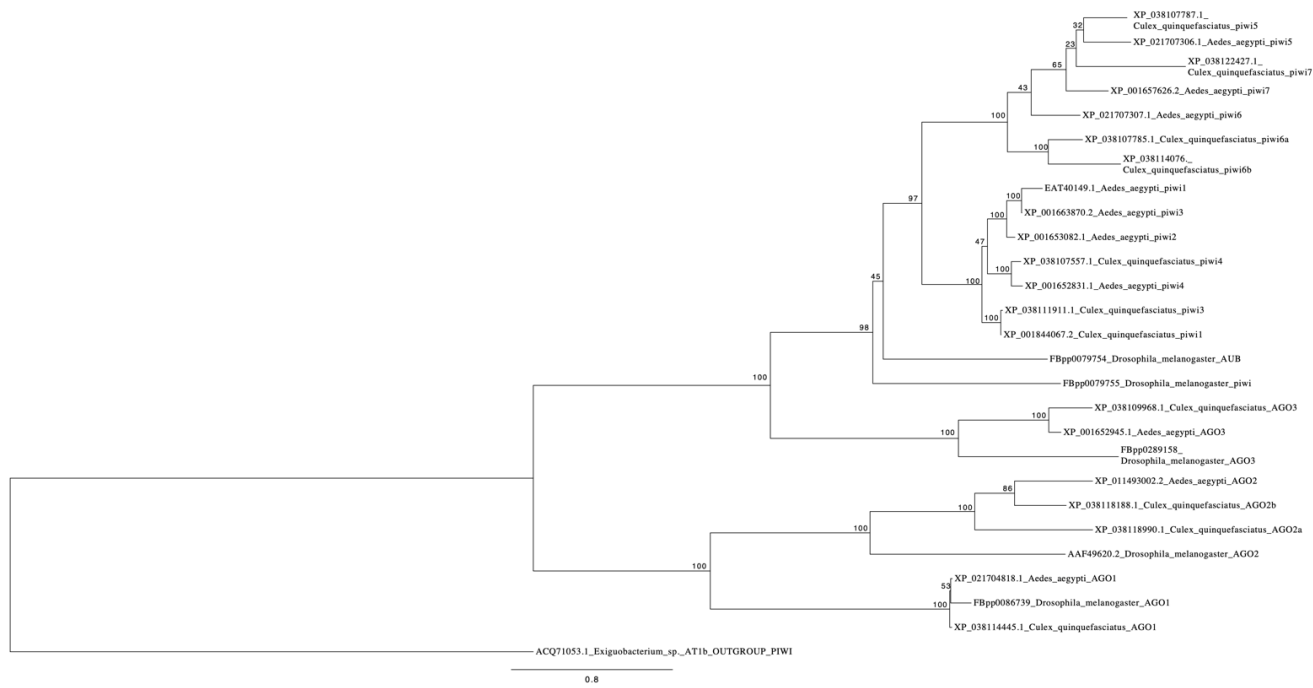

**Figure S3.** RNAi-related proteins in *Cx. quinquefasciatus*. RNAi-related Argonaute and PIWI proteins in *Cx. quinquefasciatus* were searched based on similarity to annotated *Ae. aegypti* proteins. Protein sequences from *Ae. aegypti*, *Cx. quinquefasciatus* and *D. melanogaster* were aligned, and a maximum-likelihood-based phylogenetic tree was built using PhymI, with 1000 bootstraps and *Exiguobacterium* sp. PIWI as an outgroup. Bootstrap values are given as percentages. Both *Cx. quinquefasciatus* and *Ae. aegypti* have seven Piwi proteins. However, Piwi5 and Piwi4 proteins of *Ae. aegypti* and *Cx. quinquefasciatus* clustered together, while other Piwis did not directly cluster with their *Ae. aegypti* counterparts and had a different common ancestor. For instance, *Ae. aegypti* Piwi1, 2 and 3 cluster closely together and come from a common ancestor, but *Cx. quinquefasciatus* has only two Piwis, named Piwi1 and 3, which constituted a separate cluster from *Ae. aegypti* Piwi1, 2 and 3. In addition, *Cx. quinquefasciatus* has two Piwi6 and two Ago2 homologues (here named Piwi 6a/6b and Ago2a/2b, respectively), whereas *Ae. aegypti* only encodes one of each.
